# Supplementary figures and images for: High-precision low-level Cd isotopic analysis using MC-ICP-MS and its application to marine samples from Terra Nova Bay (Antarctica)
Source: Royal Society of Chemistry journal article supplement (doi:10.1039/d4ja00214h), 2024-01-01

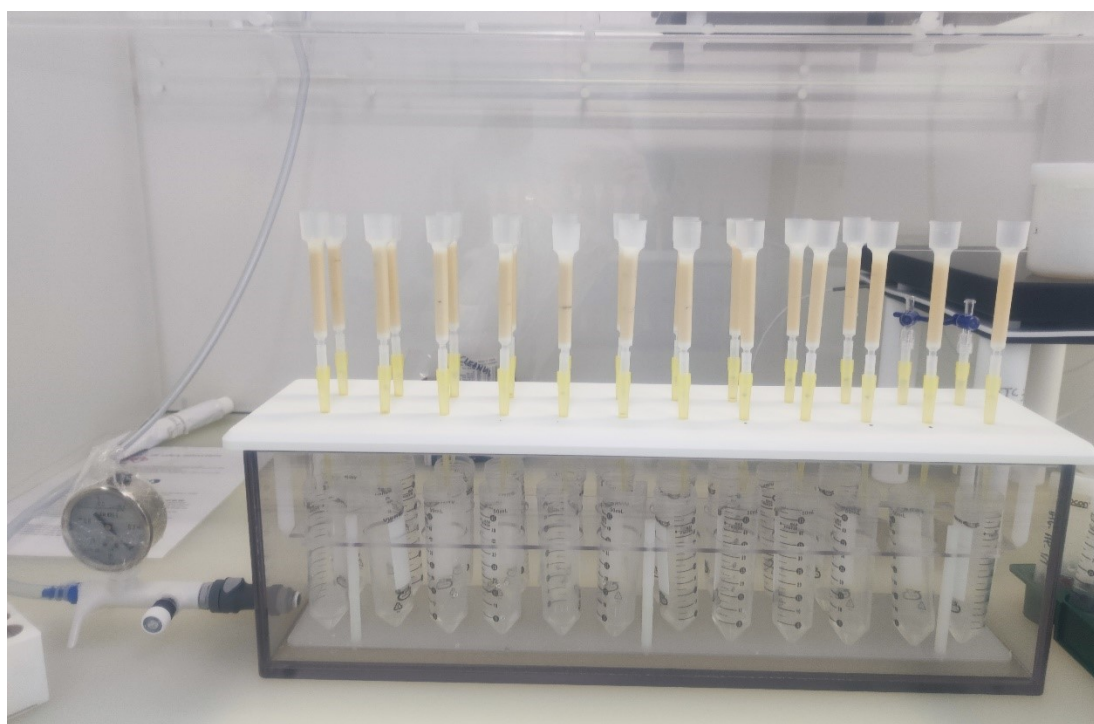

*Figure S1 Vacuum box used for the chromatographic isolation procedure.*

Supplement: d4ja00214h1.pdf [file d4ja00214h1.pdf]
